CORRECTION

# Correction: Fine-Scale Habitat Heterogeneity Influences Occupancy in Terrestrial Mammals in a Temperate Region of Australia

Ingrid Stirnemann, Alessio Mortelliti, Philip Gibbons, David B. Lindenmayer

[Fig 2](#) is a duplicate of Fig 1. The authors have provided a corrected version of [Fig 2](#) here.

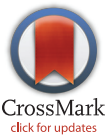

## OPEN ACCESS

**Citation:** Stirnemann I, Mortelliti A, Gibbons P, Lindenmayer DB (2015) Correction: Fine-Scale Habitat Heterogeneity Influences Occupancy in Terrestrial Mammals in a Temperate Region of Australia. PLoS ONE 10(10): e0140802. doi:10.1371/journal.pone.0140802

**Published:** October 14, 2015

**Copyright:** © 2015 Stirnemann et al. This is an open access article distributed under the terms of the [Creative Commons Attribution License](#), which permits unrestricted use, distribution, and reproduction in any medium, provided the original author and source are credited.

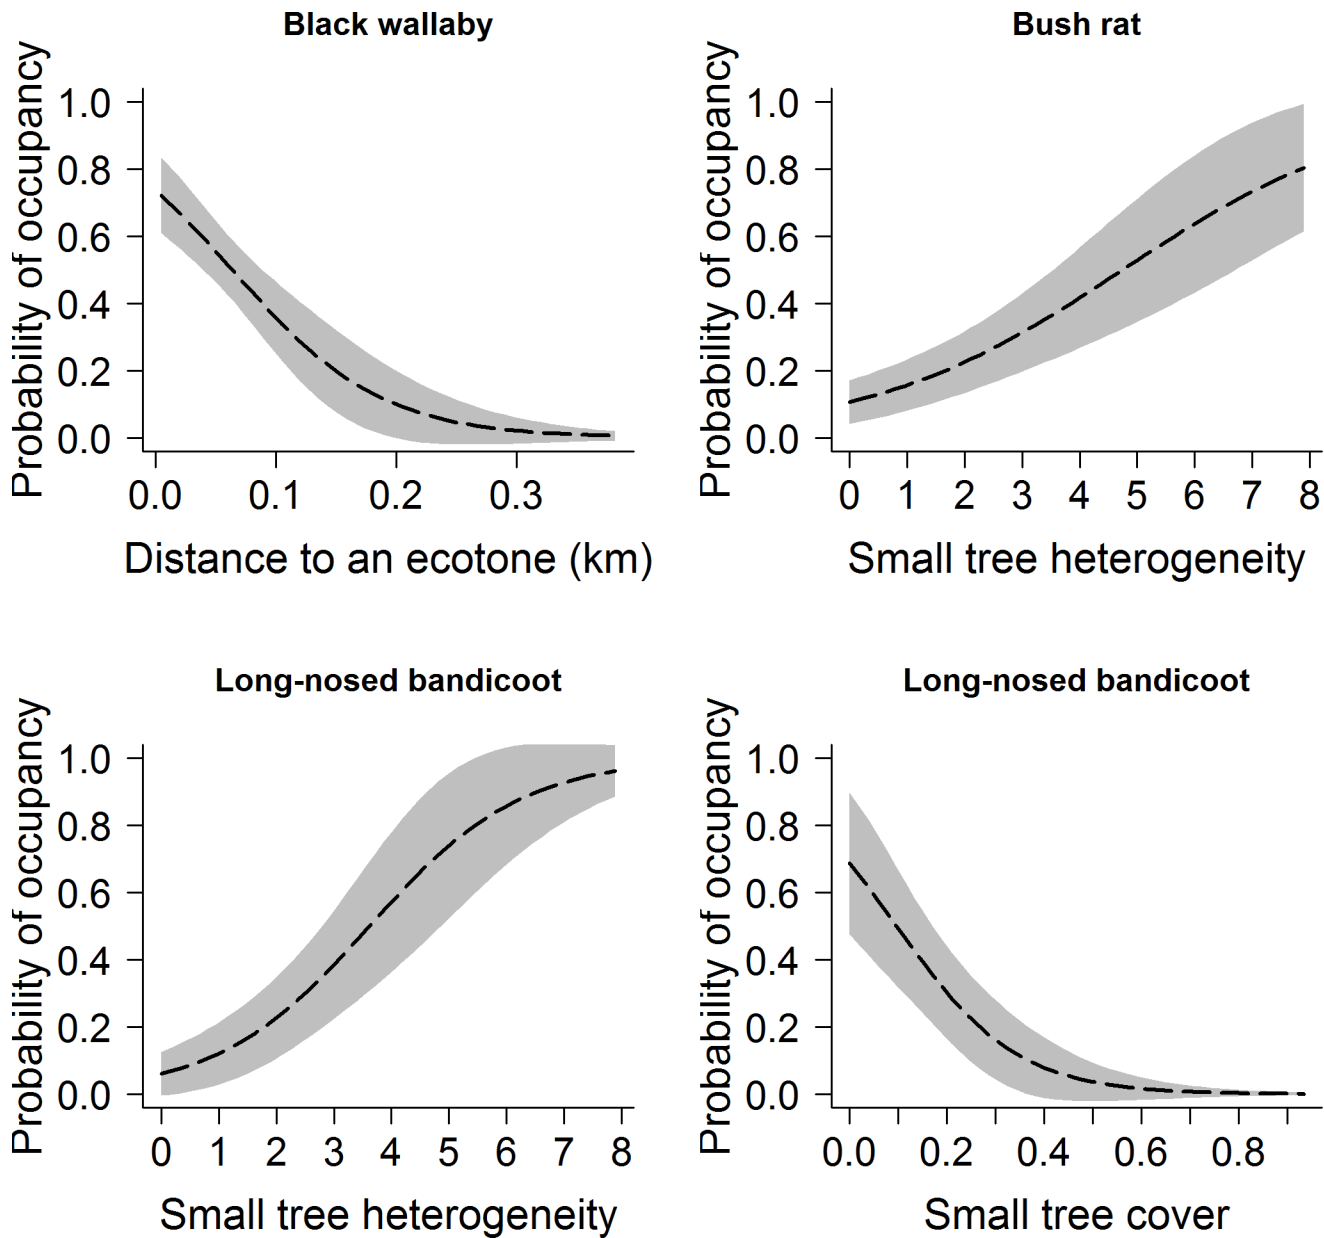

**Fig 2. Probability of occupancy ( $\pm$  S.E.) of three mammals: black wallaby, bush rat, and long-nosed bandicoot in response to cover of small trees and heterogeneity of small trees, and distance to an ecotone.**

doi:10.1371/journal.pone.0140802.g001

### Reference

1. Stirnemann I, Mortelliti A, Gibbons P, Lindenmayer DB (2015) Fine-Scale Habitat Heterogeneity Influences Occupancy in Terrestrial Mammals in a Temperate Region of Australia. *PLoS ONE* 10(9): e0138681. doi:[10.1371/journal.pone.0138681](https://doi.org/10.1371/journal.pone.0138681) PMID: [26394327](https://pubmed.ncbi.nlm.nih.gov/26394327/)
